# Supplementary material for: Seasonal, Weekly, and Diurnal Black Carbon in Moscow Megacity Background under Impact of Urban and Regional Sources
Source: MDPI journal article supplement (doi:10.3390/atmos13040563), 2022-03-30
Supplement: s1 [file s1]

# Supplementary Materials: Seasonal, Weekly, and Diurnal Black Carbon in Moscow Megacity Background under Impact of Urban and Regional Sources

Olga Popovicheva <sup>1,\*</sup>, Marina Chichaeva <sup>2</sup>, Roman Kovach <sup>2</sup>, Ekaterina Zhdanova <sup>2</sup> and Nikalay Kasimov <sup>2</sup>

**Table S1.** Means of meteorological parameters: air temperature  $T(^{\circ}\text{C})$ , water vapor pressure  $e$  (hPa), precipitation  $p$  (mm), and wind speed  $v$  (m/s) for separated seasonal periods of 2019 and SPRING 2018. Differences  $\Delta$  with means in 1981-2010 years, according to Meteorological Observatory MSU dataset.

| Period      | dates                       | air temperature<br>/ $\Delta T$ | water vapor<br>pressure / $\Delta e$ | precipitation / $\Delta p$ | Wind speed / $\Delta v$ |
|-------------|-----------------------------|---------------------------------|--------------------------------------|----------------------------|-------------------------|
| <b>2019</b> |                             |                                 |                                      |                            |                         |
| SPRING 1    | 30.04.2019 -<br>07.05.2019  | 12.3/ 0.4                       | 7.7/ 0.1                             | 7.4/ -1.8                  | 1.8/-0.7                |
| SPRING 2    | 07.05.2019 -<br>31.05.2019  | 17.5/3.6                        | 12.1/ 2.5                            | 56.6/ 14.4                 | 1.7/-0.6                |
| SUMMER      | 01.06.2019 -<br>01.08.2019  | 18.1/-0.3                       | 13.4/ -0.5                           | 148.3/ -15.7               | 1.6/-0.5                |
| AUTUMN      | 23.09.2019 - 30.11.<br>2019 | 5.4/2.3                         | 7.7/ 1.0                             | 91.0/ -50.3                | 2.1/-0.4                |
| WINTER      | 01.12.2019 -<br>19.01.2020  | 0.4/ 6.1                        | 5.5/ 1.8                             | 24/ -56.6                  | 2.2/-0.4                |
| <b>2018</b> |                             |                                 |                                      |                            |                         |
| SPRING      | 30.04.2018 -<br>31.05.2018  | 16.5/6.2                        | 10.4/1.3                             | 50.9/0.4                   | 1.8/-0.5                |

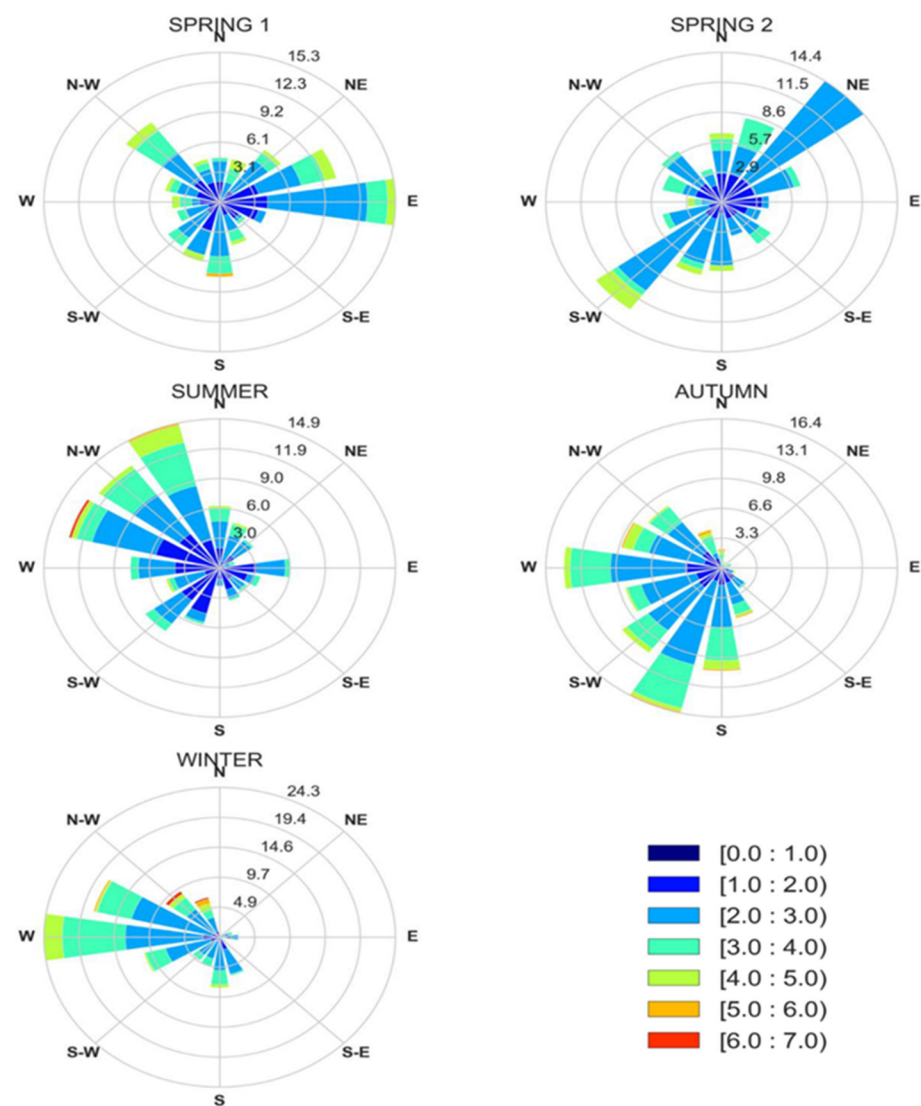

**Figure S1.** Wind roses for SPRING 1, SPRING 2, SUMMER, AUTUMN, and WINTER periods. Wind rose for SPRING 2018 is shown in [36].
